# Supplementary material for: The Construction of Risk Prediction Models Using GWAS Data and Its Application to a Type 2 Diabetes Prospective Cohort
Source: PubMed Central journal article supplement (PMC3961382; doi:10.1371/journal.pone.0092549), 2014-03-20

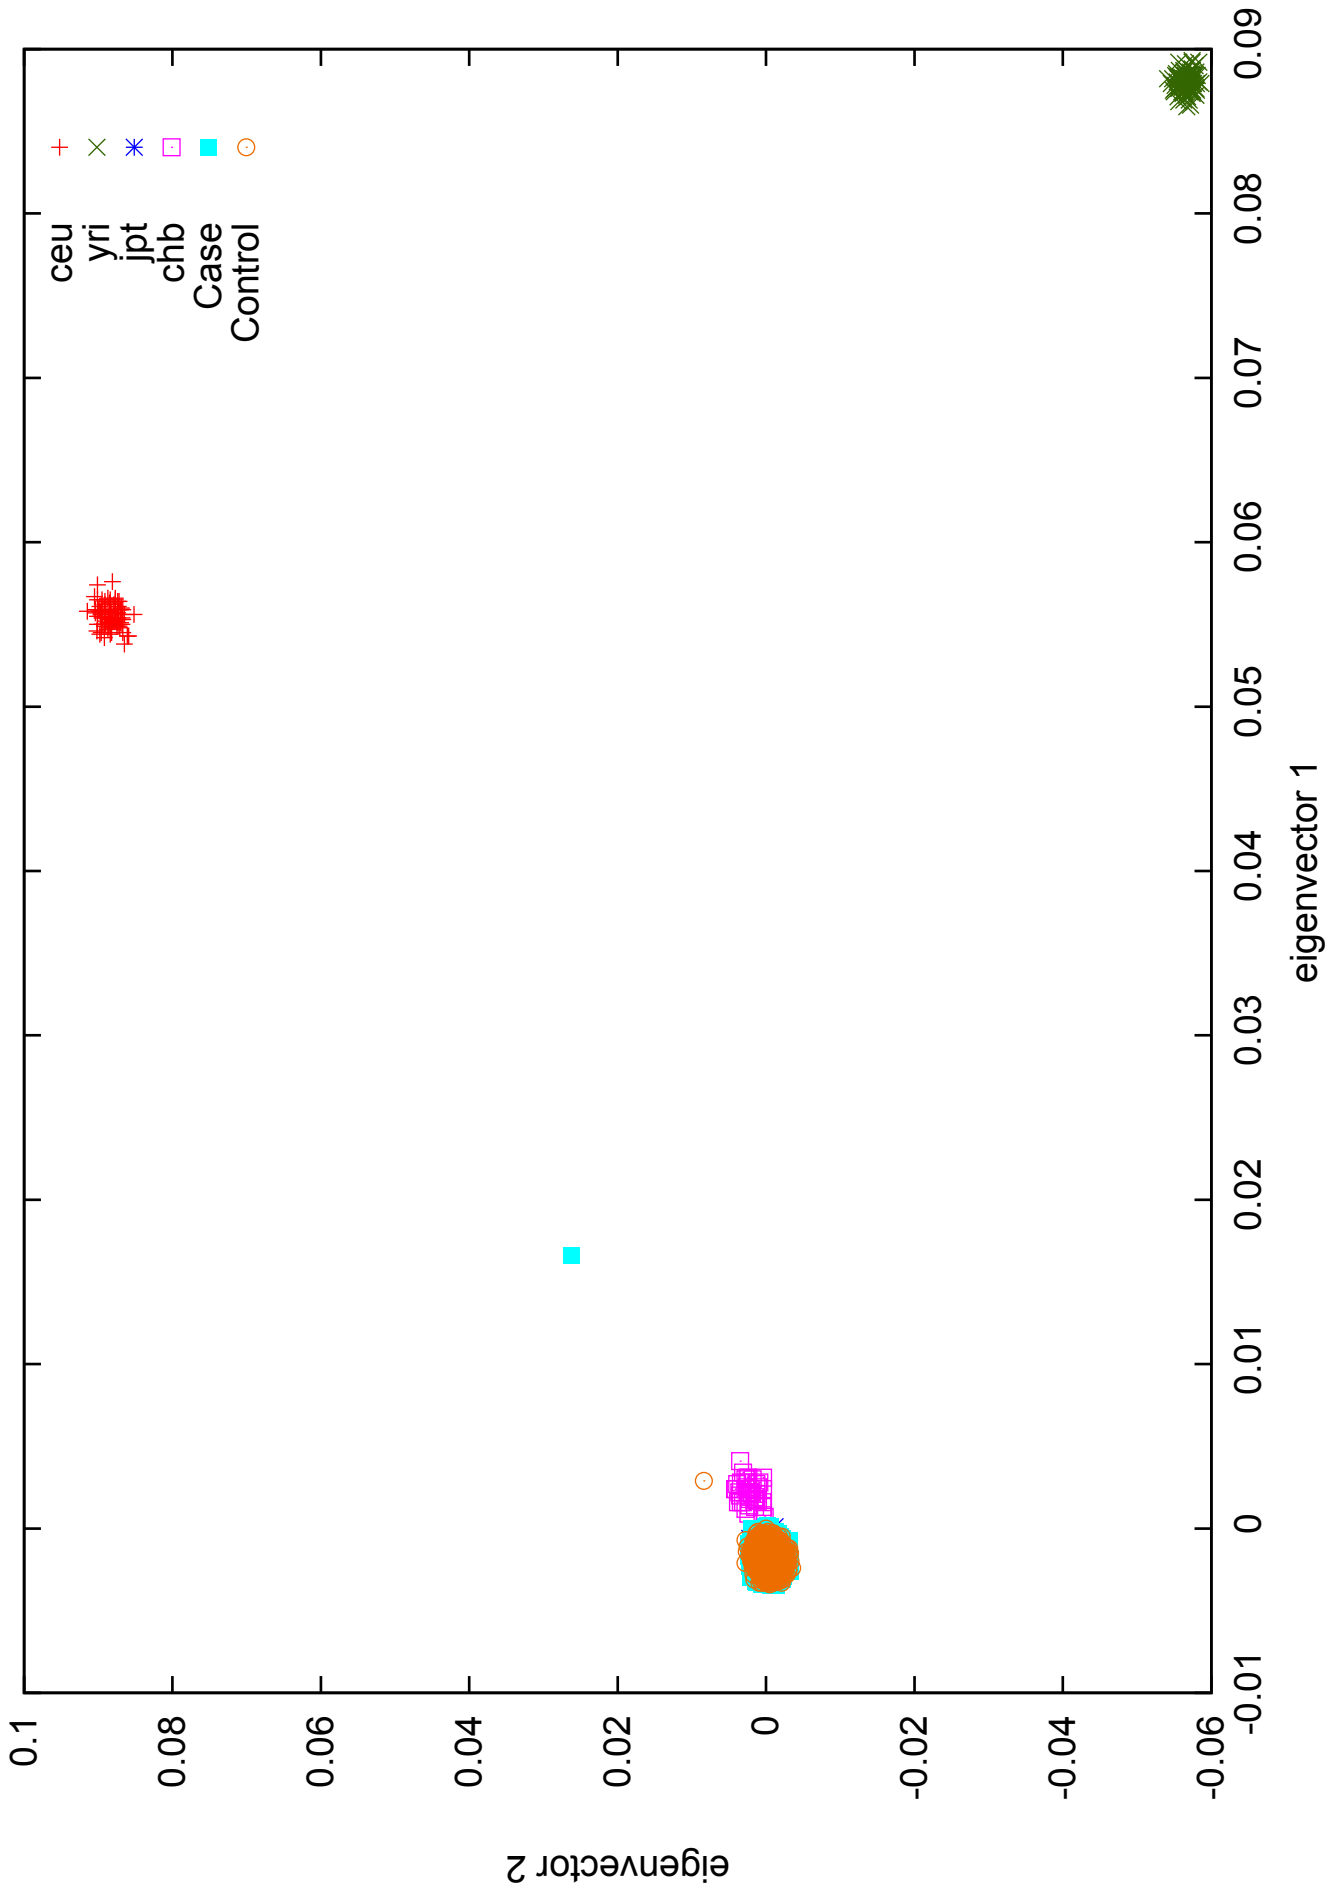

Supplement: pone.0092549.s002.pdf [file pone.0092549.s002.pdf]
